# Supplementary material for: Mutual transformation between crystalline phases and dielectric properties of coordination polymers with the formula [Cd(N-methylimidazole)2(H2O)x(glutarate)]·nH2O (x = 0 or 1; n = 0 or 4)
Source: Royal Society of Chemistry journal article supplement (doi:10.1039/c4ce00997e), 2014-01-01
Supplement: c4ce00997e1.pdf [file c4ce00997e1.pdf]

## ESI

### **Mutual transformation between crystalline phases and dielectric properties of coordination polymers with formula of $[\text{Cd}(\text{N-methylimidazole})_2(\text{H}_2\text{O})_x(\text{glutarate})] \cdot n\text{H}_2\text{O}$ ( $x = 0$ or $1$ ; $n = 0$ or $4$ )**

Chen Xue,<sup>a,b</sup> Heng Xu,<sup>\*b</sup> Rong-Yi Huang,<sup>b</sup> Xiao-Ming Ren<sup>\*ac</sup>

<sup>a</sup> State Key Laboratory of Materials-Oriented Chemical Engineering and College of Science, Nanjing University of Technology, Nanjing 210009

<sup>b</sup> Anhui Key Laboratory of Functional Coordination Compounds, School of Chemistry and Chemical Engineering, Anqing Normal University, Anqing 246003, P. R. China

<sup>c</sup> College of Materials Science and Engineering, Nanjing University of Technology, Nanjing 210009

Tel.: +86 25 58139476

Fax: +86 25 58139481

Email: [xmren@njtech.edu.cn](mailto:xmren@njtech.edu.cn)

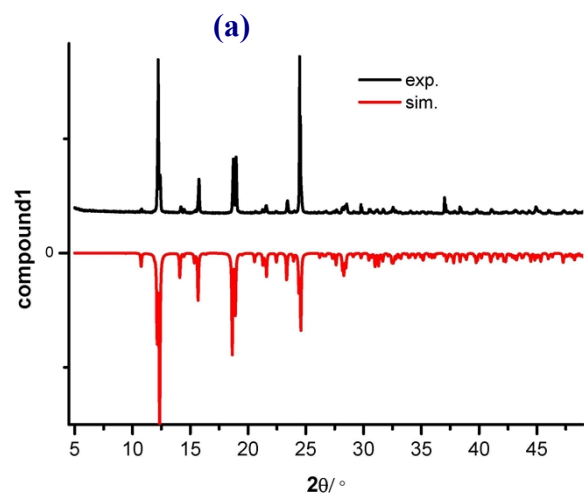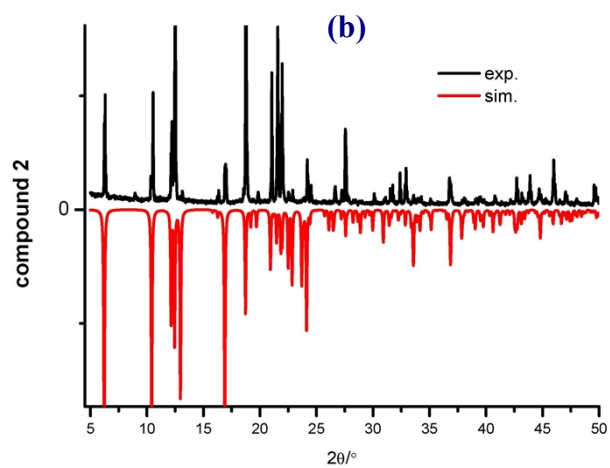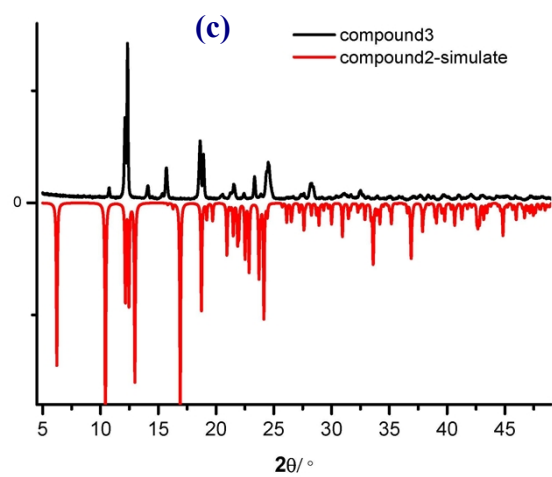

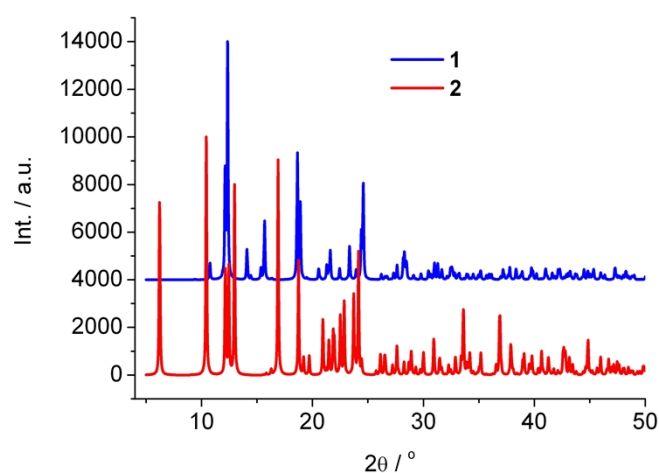

Figure S1 PXRD profiles of (a) the experimental and the simulated patterns for **1** (b) the experimental and the simulated patterns for **2** (c) the experimental pattern for **3** and the simulated pattern for **2** (d) the simulated patterns for **1** and **2** where the differences are obvious between the simulated PXRD patterns of **1** and **2**.

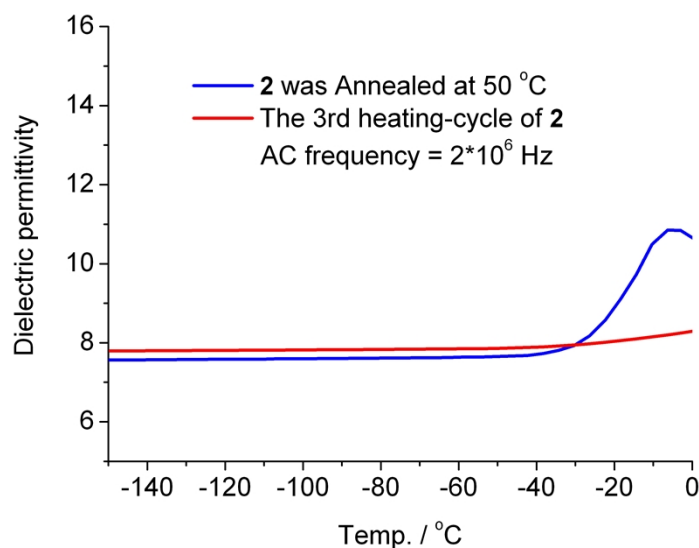

Figure S2 Temperature-dependent dielectric constants for **3** obtained from the annealed at 50 °C and the swept by N<sub>2</sub> flow, respectively, where the slight difference of two plots between -30 and 0 °C arises from the difference of a little amount of water in the samples.
